# Supplementary material
Source: Springer Nature journal article supplement (https://www.springermedizin.de/resource/supplementary/12885_2011_2998_MOESM5_ESM.pdf/9462508)

HE

NSE

p1

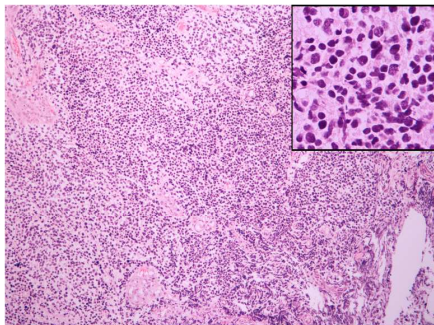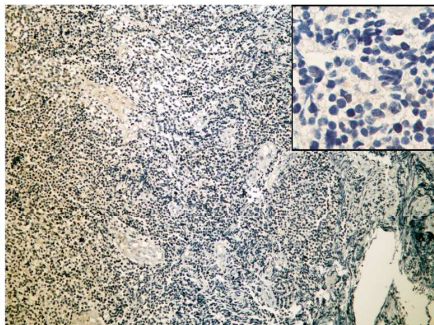

p3

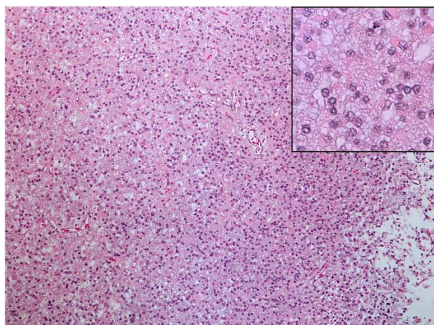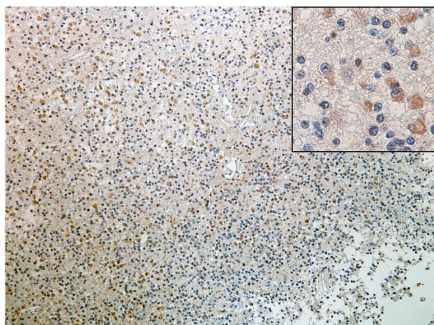

p23

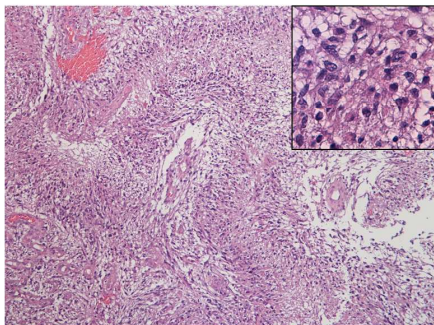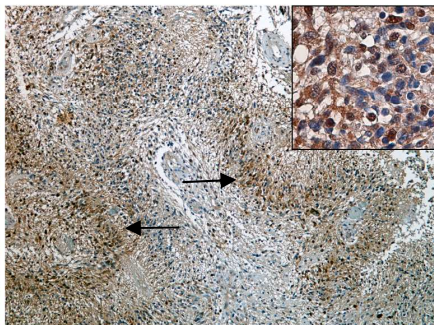

p25

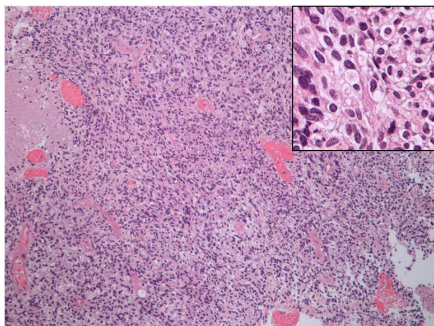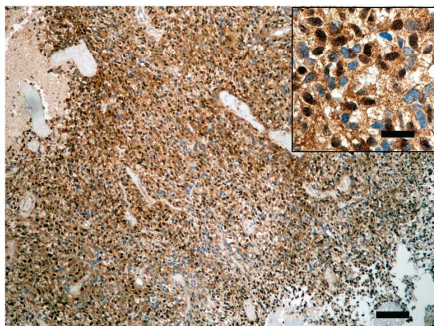

Supplement: MOESM5 [file 9462508]
